# Supplementary material
Source: HighWire-hosted journal article supplement (https://drc.bmj.com/content/7/1/e000652)
Supplement: inline-supplementary-material-1 [file inline-supplementary-material-1.pdf]

**Supplemental Table 1. Sleep characteristics, sociodemographic characteristics, health behaviors, and clinical characteristics overall and by race among 39,071 adult women in the Sister Study.**

|                                              | All         | White       | Black       | Hispanic    |
|----------------------------------------------|-------------|-------------|-------------|-------------|
| Sample size, N (%)                           | 39,071      | 34,062 (87) | 3,167 (8)   | 1,842 (5)   |
| <b>Sociodemographic characteristics</b>      |             |             |             |             |
| Age, years                                   | 54.8 ± 8.8  | 55.2 ± 8.8  | 52.4 ± 8.1  | 52.2 ± 8.9  |
| Educational attainment                       |             |             |             |             |
| <HS                                          | 1           | 1           | 1           | 8           |
| HS/GED                                       | 13          | 14          | 8           | 14          |
| Some college                                 | 33          | 32          | 34          | 35          |
| ≥Bachelor's                                  | 53          | 53          | 57          | 43          |
| Marital Status                               |             |             |             |             |
| Married or living as married                 | 76          | 79          | 54          | 69          |
| Single/never married                         | 5           | 4           | 14          | 7           |
| Widowed/separated/divorced                   | 19          | 17          | 32          | 24          |
| Currently working shift/irregular hours, yes | 15          | 15          | 14          | 10          |
| Total years worked shifts                    |             |             |             |             |
| None                                         | 62          | 61          | 68          | 74          |
| 1 to 2                                       | 3           | 3           | 3           | 3           |
| 3 to 4                                       | 8           | 9           | 7           | 7           |
| >4                                           | 26          | 27          | 22          | 16          |
| <b>Sleep characteristics</b>                 |             |             |             |             |
| Sleep duration *                             |             |             |             |             |
| Recommended (7-9 hours)                      | 72          | 75          | 47          | 63          |
| Short (<7 hours)                             | 28          | 25          | 53          | 37          |
| Time to fall asleep                          |             |             |             |             |
| ≤30 minutes                                  | 83          | 85          | 73          | 73          |
| >30 minutes                                  | 17          | 15          | 27          | 27          |
| Frequent night awakenings †                  |             |             |             |             |
| No                                           | 87          | 87          | 89          | 86          |
| Yes                                          | 13          | 13          | 11          | 14          |
| Napping frequency                            |             |             |             |             |
| <3 times/week                                | 91          | 91          | 88          | 87          |
| ≥3 times/week                                | 9           | 9           | 12          | 13          |
| Cumulative sleep score ‡                     |             |             |             |             |
| 0                                            | 53          | 55          | 32          | 41          |
| 1                                            | 32          | 31          | 41          | 36          |
| 2 to 4                                       | 16          | 14          | 27          | 23          |
| Sleep medication use, yes §                  | 11          | 11          | 7           | 9           |
| <b>Health behaviors</b>                      |             |             |             |             |
| Alcohol consumption status                   |             |             |             |             |
| Current                                      | 83          | 85          | 73          | 71          |
| Past                                         | 13          | 12          | 22          | 17          |
| Never                                        | 3           | 3           | 5           | 12          |
| Smoking status                               |             |             |             |             |
| Current                                      | 8           | 8           | 9           | 7           |
| Past                                         | 35          | 36          | 23          | 22          |
| Never                                        | 57          | 56          | 68          | 71          |
| Diet (daily glycemic load)                   | 84.9 ± 39.1 | 83.7 ± 36.8 | 94.3 ± 53.4 | 90.7 ± 48.7 |

|                                                           |             |             |             |             |
|-----------------------------------------------------------|-------------|-------------|-------------|-------------|
| Physical activity<br>(Metabolic Equivalent of Task hours) | 51.6 ± 31.4 | 52.1 ± 31.5 | 46.3 ± 29.9 | 50.6 ± 31.2 |
| <b>Clinical characteristics</b>                           |             |             |             |             |
| Mean Waist-to-hip ratio                                   | 0.80 ± 0.08 | 0.80 ± 0.08 | 0.82 ± 0.08 | 0.82 ± 0.07 |
| Waist Circumference (cm) over NHLBI guidelines (yes)      | 36          | 35          | 55          | 38          |
| Mean BMI (kg/m <sup>2</sup> )                             | 27.2 ± 5.8  | 26.9 ± 5.7  | 30.5 ± 6.6  | 27.6 ± 5.5  |
| Menopause, yes                                            | 62          | 63          | 53          | 54          |
| Hypertension, yes                                         | 37          | 36          | 55          | 35          |
| Clinical depression, yes                                  | 19          | 20          | 14          | 22          |

HR = hazard ratio, CI = confidence interval, HS=high school, GED=general education diploma, BMI=body mass index. Significant hazard ratios are bolded.

\* Long sleep duration (>9 h) is not reported (*N* = 356).

† Frequent night awakenings was classified as "No" if participant reported waking up while sleeping less than 3 times per week and "Yes" if participant reported waking up while sleeping more than 3 times per night/day for more than 3 nights/days per week.

‡ Cumulative sleep score was calculated by summing each participant's "yes" response for each sleep characteristic. Scores range from 0 to 4, with poor sleep characteristics being combined into the category "2 to 4"

Incident T2DM rate per 1000 person-years by race/ethnicity: White 4.7, Black 11.7, Hispanic/Latina 10.1.

The following variables had missing data: diet (daily glycemic load), *N* = 825, 2% [white, n=505, 2%; black, n=229, 7%; Hispanic/Latina, n=91, 5%]. All other variables with missing values were ≤1% of the total sample.

Waist circumference measurements >88 cm for females was defined as exceeding guidelines per the National Heart, Lung and Blood Institute (NHLBI).

**Supplementary Table 2. Hazard ratios (95% CI) for type 2 diabetes risk among 39,071 adult women in the Sister Study, with women with poor sleep compared to women with recommended sleep, stratified by status of shift work/irregular work hours.**

| Shift work / Irregular work hours (Yes/No)           | Model I<br>HR (95% CIs) |                         | Model II<br>HR (95% CIs) |                         | Model III<br>HR (95% CIs) |                         | Model IV<br>HR (95% CIs) |                         |
|------------------------------------------------------|-------------------------|-------------------------|--------------------------|-------------------------|---------------------------|-------------------------|--------------------------|-------------------------|
|                                                      | Yes                     | No                      | Yes                      | No                      | Yes                       | No                      | Yes                      | No                      |
| <b>Sleep duration *</b>                              |                         |                         |                          |                         |                           |                         |                          |                         |
| Short Sleep <sup>a</sup> vs. Recommended (reference) | <b>1.55 (1.19-2.02)</b> | <b>1.31 (1.18-1.46)</b> | <b>1.36 (1.04-1.78)</b>  | 1.10 (0.99-1.23)        | <b>1.39 (1.06-1.82)</b>   | 1.07 (0.96-1.20)        | 1.27 (0.96-1.67)         | 0.99 (0.89-1.11)        |
| <b>Time to fall asleep</b>                           |                         |                         |                          |                         |                           |                         |                          |                         |
| >30 minutes vs. ≤30 minutes (reference)              | 1.22 (0.88-1.68)        | <b>1.40 (1.24-1.58)</b> | 1.11 (0.81-1.53)         | <b>1.19 (1.05-1.34)</b> | 1.03 (0.74-1.44)          | <b>1.16 (1.02-1.31)</b> | 0.98 (0.70-1.36)         | 1.10 (0.97-1.25)        |
| <b>Frequent night awakenings</b>                     |                         |                         |                          |                         |                           |                         |                          |                         |
| Yes † vs. No (reference)                             | <b>1.51 (1.08-2.10)</b> | <b>1.18 (1.03-1.36)</b> | <b>1.48 (1.06-2.06)</b>  | 1.14 (0.99-1.32)        | <b>1.47 (1.05-2.06)</b>   | 1.13 (0.98-1.31)        | 1.32 (0.94-1.86)         | 1.06 (0.92-1.22)        |
| <b>Napping Frequency</b>                             |                         |                         |                          |                         |                           |                         |                          |                         |
| ≥3 times/week vs. <3 times/week (reference)          | <b>1.79 (1.25-2.57)</b> | <b>1.63 (1.41-1.88)</b> | <b>1.61 (1.12-2.31)</b>  | <b>1.49 (1.29-1.72)</b> | <b>1.44 (0.99-2.09)</b>   | <b>1.35 (1.17-1.57)</b> | 1.31 (0.90-1.91)         | <b>1.18 (1.01-1.37)</b> |
| <b>Cumulative sleep score ‡</b>                      |                         |                         |                          |                         |                           |                         |                          |                         |
| 1 vs. 0 (reference)                                  | <b>1.37 (1.03-1.83)</b> | <b>1.25 (1.11-1.40)</b> | 1.25 (0.94-2.32)         | 1.12 (1.00-1.26)        | 1.26 (0.94-1.69)          | 1.07 (0.95-1.20)        | 1.13 (0.84-1.52)         | 1.02 (0.91-1.15)        |
| 2 to 4 vs. 0 (reference)                             | <b>1.93 (1.39-2.69)</b> | <b>1.69 (1.48-1.93)</b> | <b>1.67 (1.19-2.33)</b>  | <b>1.36 (1.19-1.56)</b> | <b>1.58 (1.12-2.22)</b>   | <b>1.27 (1.11-1.46)</b> | 1.41 (1.00-1.99)         | 1.11 (0.97-1.27)        |

HR = hazard ratio, CI = confidence interval, HS=high school, GED=general education diploma, BMI=body mass index, MET=metabolic equivalent of task. Significant hazard ratios are bolded.

\* Long sleep duration (>9 h) is not reported (N = 356).

† Frequent night awakenings was classified as "No" if participant reported waking up while sleeping less than 3 times per week and "Yes" if participant reported waking up while sleeping more than 3 times per night/day for more than 3 nights/days per week.

‡ Cumulative sleep score was calculated by summing each participant's "yes" response for each sleep characteristic. Scores range from 0 to 4, with poor sleep characteristics being combined into the category "2 to 4"

Model I - adjusted for age (years) at baseline

Model II - further adjusted for race/ethnicity, educational attainment (<HS, HS/GED, some college, ≥bachelor's degree), marital status, and status of shift work/irregular hours (yes/no)

Model III - further adjusted for smoking status (current, past, never), alcohol consumption (current, past, never), diet (daily glycemic load), and physical activity (MET hours)

Model IV - further adjusted for hypertension, waist-to-hip ratio (WHR), and BMI (kg/m<sup>2</sup>) measured at baseline

**Supplementary Table 3. Hazard ratios (95% CI) for type 2 diabetes risk among 39,071 adult women in the Sister Study, with women with poor sleep compared to women with recommended sleep, with a sensitivity analysis for body mass index.**

| Body Mass Index (kg/m <sup>2</sup> )                  | Model I                 | Model II                | Model III               | Model IV                |
|-------------------------------------------------------|-------------------------|-------------------------|-------------------------|-------------------------|
|                                                       | HR (95% CIs)            | HR (95% CIs)            | HR (95% CIs)            | HR (95% CIs)            |
| <b>Sleep duration</b>                                 |                         |                         |                         |                         |
| <b>Short Sleep * vs. Recommended (reference)</b>      |                         |                         |                         |                         |
| Underweight/Normal                                    | <b>1.63 (1.21-2.20)</b> | <b>1.41 (1.03-1.91)</b> | <b>1.34 (0.98-1.83)</b> | <b>1.43 (1.05-1.96)</b> |
| Overweight                                            | 1.15 (0.95-1.39)        | 0.99 (0.82-1.21)        | 1.00 (0.82-1.22)        | 1.02 (0.83-1.24)        |
| Obese                                                 | 1.11 (0.97-1.25)        | 1.03 (0.90-1.17)        | 1.00 (0.88-1.15)        | 1.01 (0.89-1.16)        |
| <b>Time to Fall Asleep</b>                            |                         |                         |                         |                         |
| <b>&gt;30 minutes vs. ≤30 minutes (reference)</b>     |                         |                         |                         |                         |
| Underweight/Normal                                    | <b>2.31 (1.69-3.17)</b> | <b>1.96 (1.42-2.71)</b> | <b>1.88 (1.35-2.62)</b> | <b>1.84 (1.32-2.56)</b> |
| Overweight                                            | 1.29 (1.05-1.60)        | 1.14 (0.92-1.41)        | 1.14 (0.92-1.42)        | 1.12 (0.90-1.39)        |
| Obese                                                 | 1.01 (0.87-1.17)        | 0.97 (0.83-1.13)        | 0.93 (0.80-1.09)        | 0.94 (0.80-1.10)        |
| <b>Frequent night awakenings</b>                      |                         |                         |                         |                         |
| <b>Yes † vs. No (reference)</b>                       |                         |                         |                         |                         |
| Underweight/Normal                                    | 1.30 (0.88-1.92)        | 1.31 (0.89-1.94)        | 1.34 (0.91-1.99)        | 1.33 (0.90-1.98)        |
| Overweight                                            | 1.22 (0.96-1.54)        | 1.20 (0.94-1.53)        | 1.24 (0.97-1.58)        | 1.24 (0.97-1.59)        |
| Obese                                                 | 1.06 (0.90-1.25)        | 1.04 (0.88-1.23)        | 1.02 (0.86-1.21)        | 1.02 (0.86-1.21)        |
| <b>Napping Frequency</b>                              |                         |                         |                         |                         |
| <b>≥3 times/week vs. &lt;3 times/week (reference)</b> |                         |                         |                         |                         |
| Underweight/Normal                                    | <b>2.00 (1.35-2.97)</b> | <b>1.75 (1.17-2.61)</b> | <b>1.73 (1.15-2.59)</b> | <b>1.76 (1.18-2.64)</b> |
| Overweight                                            | <b>1.47 (1.14-1.89)</b> | <b>1.37 (1.06-1.76)</b> | 1.27 (0.98-1.65)        | 1.25 (0.96-1.63)        |
| Obese                                                 | <b>1.30 (1.10-1.54)</b> | <b>1.28 (1.08-1.52)</b> | 1.18 (0.99-1.41)        | 1.14 (0.95-1.36)        |
| <b>Cumulative sleep score ‡</b>                       |                         |                         |                         |                         |
| Underweight/Normal                                    |                         |                         |                         |                         |
| 1 vs. 0 (reference)                                   | <b>1.46 (1.05-2.03)</b> | 1.32 (0.95-1.85)        | 1.28 (0.92-1.80)        | 1.32 (0.94-1.85)        |
| 2 to 4 vs. 0 (reference)                              | <b>2.72 (1.91-3.87)</b> | <b>2.21 (1.53-3.18)</b> | <b>2.11 (1.46-3.05)</b> | <b>2.19 (1.51-3.16)</b> |
| Overweight                                            |                         |                         |                         |                         |
| 1 vs. 0 (reference)                                   | <b>1.33 (1.09-1.61)</b> | 1.20 (0.99-1.46)        | <b>1.18 (0.97-1.45)</b> | 1.21 (0.99-1.47)        |
| 2 to 4 vs. 0 (reference)                              | <b>1.42 (1.12-1.80)</b> | 1.20 (0.94-1.53)        | 1.20 (0.94-1.53)        | 1.19 (0.93-1.52)        |
| Obese                                                 |                         |                         |                         |                         |
| 1 vs. 0 (reference)                                   | 0.97 (0.85-1.11)        | 0.93 (0.81-1.07)        | 0.89 (0.77-1.02)        | 0.91 (0.79-1.05)        |
| 2 to 4 vs. 0 (reference)                              | 1.19 (1.02-1.39)        | 1.12 (0.94-1.30)        | 1.03 (0.88-1.21)        | 1.03 (0.87-1.21)        |

HR = hazard ratio, CI = confidence interval, HS=high school, GED=general education diploma, BMI=body mass index, MET=metabolic equivalent of task. Significant hazard ratios are bolded.

\* Long sleep duration (>9 h) is not reported (N = 356).

† Frequent night awakenings was classified as "No" if participant reported waking up while sleeping less than 3 times per week and "Yes" if participant reported waking up while sleeping more than 3 times per night/day for more than 3 nights/days per week.

‡ Cumulative sleep score was calculated by summing each participant's "yes" response for each sleep characteristic. Scores range from 0 to 4, with poor sleep characteristics being combined into the category "2 to 4"

Model I - adjusted for age (years) at baseline

Model II - further adjusted for race/ethnicity, educational attainment (<HS, HS/GED, some college, ≥bachelor's degree), marital status, and status of shift work/irregular hours (yes/no)

Model III - further adjusted for smoking status (current, past, never), alcohol consumption (current, past, never), diet (daily glycemic load), and physical activity (MET hours)

Model IV - further adjusted for hypertension, waist-to-hip ratio (WHR), and BMI (kg/m<sup>2</sup>) measured at baseline

**Supplementary Table 4. Hazard ratios (95% CI) for type 2 diabetes risk among 39,071 adult women in the Sister Study, with women with poor sleep compared to women with recommended sleep, with a sensitivity analysis for age category.**

| Age Category                                          | Model II                | Model III               | Model IV                |
|-------------------------------------------------------|-------------------------|-------------------------|-------------------------|
|                                                       | HR (95% CIs)            | HR (95% CIs)            | HR (95% CIs)            |
| <b>Sleep duration</b>                                 |                         |                         |                         |
| <b>Short Sleep * vs. Recommended (reference)</b>      |                         |                         |                         |
| 35-44                                                 | <b>1.49 (1.08-2.06)</b> | <b>1.44 (1.03-2.00)</b> | 1.30 (0.93-1.81)        |
| 45-54                                                 | <b>1.20 (1.02-1.41)</b> | <b>1.17 (0.99-1.38)</b> | 1.06 (0.89-1.25)        |
| 55-64                                                 | 1.06 (0.90-1.26)        | 1.00 (0.84-1.19)        | 0.92 (0.77-1.09)        |
| 65+                                                   | 1.14 (0.87-1.48)        | 1.13 (0.87-1.48)        | 1.13 (0.86-1.48)        |
| <b>Time to Fall Asleep</b>                            |                         |                         |                         |
| <b>&gt;30 minutes vs. ≤30 minutes (reference)</b>     |                         |                         |                         |
| 35-44                                                 | 0.97 (0.64-1.45)        | 0.92 (0.61-1.40)        | 0.82 (0.54-1.25)        |
| 45-54                                                 | <b>1.26 (1.04-1.52)</b> | 1.17 (0.96-1.42)        | 1.11 (0.91-1.34)        |
| 55-64                                                 | 1.07 (0.88-1.30)        | 1.05 (0.86-1.28)        | 0.97 (0.80-1.18)        |
| 65+                                                   | <b>1.48 (1.12-1.95)</b> | <b>1.43 (1.08-1.89)</b> | <b>1.43 (1.08-1.90)</b> |
| <b>Frequent night awakenings</b>                      |                         |                         |                         |
| <b>Yes † vs. No (reference)</b>                       |                         |                         |                         |
| 35-44                                                 | 1.17 (0.72-1.90)        | 1.15 (0.69-1.90)        | 1.03 (0.62-1.71)        |
| 45-54                                                 | <b>1.41 (1.15-1.73)</b> | <b>1.37 (1.11-1.68)</b> | 1.20 (0.98-1.48)        |
| 55-64                                                 | 0.96 (0.77-1.20)        | 0.97 (0.78-1.21)        | 0.94 (0.75-1.18)        |
| 65+                                                   | 1.29 (0.95-1.76)        | 1.29 (0.95-1.77)        | 1.25 (0.92-1.71)        |
| <b>Napping Frequency</b>                              |                         |                         |                         |
| <b>≥3 times/week vs. &lt;3 times/week (reference)</b> |                         |                         |                         |
| 35-44                                                 | <b>2.06 (1.33-3.19)</b> | <b>1.71 (1.08-2.73)</b> | 1.50 (0.94-2.42)        |
| 45-54                                                 | <b>1.62 (1.29-2.04)</b> | <b>1.45 (1.14-1.83)</b> | 1.20 (0.94-1.53)        |
| 55-64                                                 | <b>1.46 (1.16-1.82)</b> | 1.34 (1.06-1.69)        | 1.12 (0.89-1.41)        |
| 65+                                                   | 1.28 (0.95-1.72)        | 1.25 (0.93-1.68)        | 1.14 (0.84-1.54)        |
| <b>Cumulative sleep score ‡</b>                       |                         |                         |                         |
| 35-44                                                 |                         |                         |                         |
| 1 vs. 0 (reference)                                   | 1.36 (0.97-1.92)        | 1.32 (0.93-1.88)        | 1.16 (0.81-1.66)        |
| 2 to 4 vs. 0 (reference)                              | <b>1.62 (1.07-2.47)</b> | 1.42 (0.91-2.21)        | 1.22 (0.78-1.90)        |
| 45-54                                                 |                         |                         |                         |
| 1 vs. 0 (reference)                                   | 1.15 (0.96-1.38)        | <b>1.11 (0.92-1.33)</b> | 1.04 (0.86-1.25)        |
| 2 to 4 vs. 0 (reference)                              | <b>1.60 (1.31-1.96)</b> | <b>1.46 (1.18-1.79)</b> | 1.20 (0.98-1.48)        |
| 55-64                                                 |                         |                         |                         |
| 1 vs. 0 (reference)                                   | 1.12 (0.95-1.34)        | 1.05 (0.88-1.26)        | 0.98 (0.82-1.16)        |
| 2 to 4 vs. 0 (reference)                              | 1.17 (0.94-1.44)        | 1.10 (0.87-1.36)        | 0.94 (0.76-1.16)        |
| 65+                                                   |                         |                         |                         |
| 1 vs. 0 (reference)                                   | 1.07 (0.81-1.42)        | 1.04 (0.79-1.38)        | 1.02 (0.77-1.36)        |
| 2 to 4 vs. 0 (reference)                              | <b>1.61 (1.19-2.17)</b> | <b>1.58 (1.17-2.13)</b> | <b>1.50 (1.11-2.03)</b> |

HR = hazard ratio, CI = confidence interval, HS=high school, GED=general education diploma, BMI=body mass index, MET=metabolic equivalent of task. Significant hazard ratios are bolded.

\* Long sleep duration (>9 h) is not reported (N = 356).

† Frequent night awakenings was classified as "No" if participant reported waking up while sleeping less than 3 times per week and "Yes" if participant reported waking up while sleeping more than 3 times per night/day for more than 3 nights/days per week.

‡ Cumulative sleep score was calculated by summing each participant's "yes" response for each sleep characteristic. Scores range from 0 to 4, with poor sleep characteristics being combined into the category "2 to 4"

Model II - further adjusted for race/ethnicity, educational attainment (<HS, HS/GED, some college, ≥bachelor's degree), marital status, and status of shift work/irregular hours (yes/no)

Model III - further adjusted for smoking status (current, past, never), alcohol consumption (current, past, never), diet (daily glycemic load), and physical activity (MET hours)

Model IV - further adjusted for hypertension, waist-to-hip ratio (WHR), and BMI (kg/m<sup>2</sup>) measured at baseline

**Supplementary Table 5. Hazard ratios (95% CI) for type 2 diabetes risk among 39,071 adult women in the Sister Study, with women with poor sleep compared to women with recommended sleep, with a sensitivity analysis for sleep medication use.**

| Sleep Medication Use (Yes/No)               | Model I                 |                         | Model II                |                         | Model III        |                         | Model IV         |                         |
|---------------------------------------------|-------------------------|-------------------------|-------------------------|-------------------------|------------------|-------------------------|------------------|-------------------------|
|                                             | HR (95% CIs)            |                         | HR (95% CIs)            |                         | HR (95% CIs)     |                         | HR (95% CIs)     |                         |
|                                             | Yes                     | No                      | Yes                     | No                      | Yes              | No                      | Yes              | No                      |
| <b>Sleep duration *</b>                     |                         |                         |                         |                         |                  |                         |                  |                         |
| Short Sleep vs. Recommended (reference)     | 1.14 (0.85-1.51)        | <b>1.37 (1.23-1.52)</b> | 1.04 (0.77-1.39)        | <b>1.15 (1.03-1.28)</b> | 1.02 (0.76-1.38) | <b>1.12 (1.01-1.26)</b> | 0.99 (0.73-1.34) | 1.03 (0.92-1.15)        |
| <b>Time to fall asleep</b>                  |                         |                         |                         |                         |                  |                         |                  |                         |
| >30 minutes vs. ≤30 minutes (reference)     | <b>1.44 (1.09-1.90)</b> | <b>1.33 (1.17-1.51)</b> | <b>1.34 (1.01-1.77)</b> | <b>1.13 (0.99-1.28)</b> | 1.31 (0.99-1.74) | 1.09 (0.96-1.25)        | 1.25 (0.94-1.66) | 1.03 (0.91-1.18)        |
| <b>Frequent night awakenings</b>            |                         |                         |                         |                         |                  |                         |                  |                         |
| Yes † vs. No (reference)                    | 0.89 (0.62-1.28)        | <b>1.27 (1.11-1.46)</b> | 0.87 (0.61-1.25)        | <b>1.24 (1.08-1.42)</b> | 0.89 (0.62-1.27) | <b>1.23 (1.07-1.41)</b> | 0.88 (0.61-1.27) | 1.12 (0.97-1.29)        |
| <b>Napping Frequency</b>                    |                         |                         |                         |                         |                  |                         |                  |                         |
| ≥3 times/week vs. <3 times/week (reference) | 1.55 (1.07-2.24)        | <b>1.66 (1.43-1.91)</b> | <b>1.49 (1.03-2.15)</b> | <b>1.50 (1.30-1.73)</b> | 1.39 (0.95-2.02) | <b>1.35 (1.17-1.57)</b> | 1.27 (0.87-1.86) | <b>1.19 (1.02-1.38)</b> |
| <b>Cumulative sleep score ‡</b>             |                         |                         |                         |                         |                  |                         |                  |                         |
| 1 vs. 0 (reference)                         | 1.28 (0.93-1.75)        | <b>1.26 (1.12-1.41)</b> | 1.22 (0.89-1.67)        | <b>1.12 (1.00-1.25)</b> | 1.24 (0.87-1.75) | 1.07 (0.95-1.20)        | 1.17 (0.85-1.61) | 1.01 (0.90-1.14)        |
| 2 to 4 vs. 0 (reference)                    | 1.41 (1.01-1.98)        | <b>1.75 (1.54-2.00)</b> | 1.27 (0.90-1.79)        | <b>1.41 (1.23-1.61)</b> | 1.24 (0.91-1.71) | <b>1.32 (1.15-1.51)</b> | 1.13 (0.80-1.61) | 1.13 (0.99-1.30)        |

HR = hazard ratio, CI = confidence interval, HS=high school, GED=general education diploma, BMI=body mass index, MET=metabolic equivalent of task. Significant hazard ratios are bolded.

\* Long sleep duration (>9 h) is not reported (N = 356).

† Frequent night awakenings was classified as "No" if participant reported waking up while sleeping less than 3 times per week and "Yes" if participant reported waking up while sleeping more than 3 times per night/day for more than 3 nights/days per week.

‡ Cumulative sleep score was calculated by summing each participant's "yes" response for each sleep characteristic. Scores range from 0 to 4, with poor sleep characteristics being combined into the category "2 to 4"

Model I - adjusted for age (years) at baseline

Model II - further adjusted for race/ethnicity, educational attainment (<HS, HS/GED, some college, ≥bachelor's degree), marital status, and status of shift work/irregular hours (yes/no)

Model III - further adjusted for smoking status (current, past, never), alcohol consumption (current, past, never), diet (daily glycemic load), and physical activity (MET hours)

Model IV - further adjusted for hypertension, waist-to-hip ratio (WHR), and BMI (kg/m<sup>2</sup>) measured at baseline



**Supplementary Table 6. Hazard ratios (95% CI) for type 2 diabetes risk among 39,071 adult women in the Sister Study, with women with poor sleep compared to women with recommended sleep, with a sensitivity analysis for type 2 diabetes incidence starting one year after baseline.**

| Incidence Starting at One Year from Baseline (Yes/No) | Model I                 |                         | Model II                |                         | Model III               |                         | Model IV                |                         |
|-------------------------------------------------------|-------------------------|-------------------------|-------------------------|-------------------------|-------------------------|-------------------------|-------------------------|-------------------------|
|                                                       | HR (95% CIs)            |                         | HR (95% CIs)            |                         | HR (95% CIs)            |                         | HR (95% CIs)            |                         |
|                                                       | 1 year                  | Baseline                |
| <b>Sleep duration *</b>                               |                         |                         |                         |                         |                         |                         |                         |                         |
| Short Sleep vs. Recommended (reference)               | <b>1.36 (1.23-1.51)</b> | <b>1.34 (1.21-1.48)</b> | <b>1.15 (1.03-1.28)</b> | <b>1.13 (1.02-1.26)</b> | <b>1.13 (1.01-1.26)</b> | <b>1.11 (1.00-1.23)</b> | 1.03 (0.93-1.15)        | 1.03 (0.92-1.14)        |
| <b>Time to fall asleep</b>                            |                         |                         |                         |                         |                         |                         |                         |                         |
| >30 minutes vs. ≤30 minutes (reference)               | <b>1.34 (1.19-1.51)</b> | <b>1.36 (1.21-1.53)</b> | <b>1.16 (1.02-1.31)</b> | <b>1.18 (1.05-1.32)</b> | <b>1.14 (1.00-1.29)</b> | <b>1.14 (1.01-1.28)</b> | 1.07 (0.94-1.21)        | 1.08 (0.96-1.22)        |
| <b>Frequent night awakenings</b>                      |                         |                         |                         |                         |                         |                         |                         |                         |
| Yes † vs. No (reference)                              | <b>1.22 (1.07-1.39)</b> | <b>1.22 (1.07-1.39)</b> | <b>1.18 (1.03-1.35)</b> | <b>1.19 (1.04-1.35)</b> | <b>1.17 (1.02-1.34)</b> | <b>1.18 (1.03-1.34)</b> | 1.07 (0.93-1.23)        | 1.09 (0.95-1.24)        |
| <b>Napping Frequency</b>                              |                         |                         |                         |                         |                         |                         |                         |                         |
| ≥3 times/week vs. <3 times/week (reference)           | <b>1.60 (1.39-1.85)</b> | <b>1.64 (1.44-1.88)</b> | <b>1.46 (1.27-1.69)</b> | <b>1.50 (1.31-1.72)</b> | <b>1.34 (1.15-1.55)</b> | <b>1.36 (1.19-1.57)</b> | <b>1.16 (1.00-1.35)</b> | <b>1.20 (1.04-1.37)</b> |
| <b>Cumulative sleep score ‡</b>                       |                         |                         |                         |                         |                         |                         |                         |                         |
| 1 vs. 0 (reference)                                   | <b>1.27 (1.14-1.42)</b> | <b>1.26 (1.13-1.40)</b> | <b>1.14 (1.02-1.28)</b> | <b>1.14 (1.02-1.27)</b> | 1.10 (0.98-1.23)        | 1.09 (0.98-1.22)        | 1.03 (0.92-1.16)        | 1.04 (0.93-1.15)        |
| 2 to 4 vs. 0 (reference)                              | <b>1.70 (1.50-1.93)</b> | <b>1.71 (1.51-1.93)</b> | <b>1.38 (1.21-1.58)</b> | <b>1.40 (1.23-1.58)</b> | <b>1.31 (1.14-1.50)</b> | <b>1.31 (1.15-1.49)</b> | 1.12 (0.98-1.29)        | <b>1.14 (1.00-1.30)</b> |

HR = hazard ratio, CI = confidence interval, HS=high school, GED=general education diploma, BMI=body mass index, MET=metabolic equivalent of task. Significant hazard ratios are bolded.

\* Long sleep duration (>9 h) is not reported (N = 356).

† Frequent night awakenings was classified as "No" if participant reported waking up while sleeping less than 3 times per week and "Yes" if participant reported waking up while sleeping more than 3 times per night/day for more than 3 nights/days per week.

‡ Cumulative sleep score was calculated by summing each participant's "yes" response for each sleep characteristic. Scores range from 0 to 4, with poor sleep characteristics being combined into the category "2 to 4"

Model I - adjusted for age (years) at baseline

Model II - further adjusted for race/ethnicity, educational attainment (<HS, HS/GED, some college, ≥bachelor's degree), marital status, and status of shift work/irregular hours (yes/no)

Model III - further adjusted for smoking status (current, past, never), alcohol consumption (current, past, never), diet (daily glycemic load), and physical activity (MET hours)

Model IV - further adjusted for hypertension, waist-to-hip ratio (WHR), and BMI (kg/m<sup>2</sup>) measured at baseline

**Supplementary Table 7. Hazard ratios (95% CI) for type 2 diabetes risk among 39,071 adult women in the Sister Study, with women with poor sleep compared to women with recommended sleep, with a sensitivity analysis for baseline menopausal status.**

|                                             | Model I                 |                         | Model II                |                         | Model III               |                         | Model IV         |                  |
|---------------------------------------------|-------------------------|-------------------------|-------------------------|-------------------------|-------------------------|-------------------------|------------------|------------------|
|                                             | HR (95% CIs)            |                         | HR (95% CIs)            |                         | HR (95% CIs)            |                         | HR (95% CIs)     |                  |
| Menopausal status                           | Post                    | Pre                     | Post                    | Pre                     | Post                    | Pre                     | Post             | Pre              |
| <b>Sleep duration *</b>                     |                         |                         |                         |                         |                         |                         |                  |                  |
| Short Sleep vs. Recommended (reference)     | <b>1.22 (1.08-1.38)</b> | <b>1.59 (1.34-1.89)</b> | 1.07 (0.94-1.21)        | <b>1.27 (1.07-1.52)</b> | 1.06 (0.93-1.20)        | <b>1.22 (1.01-1.46)</b> | 0.98 (0.86-1.11) | 1.11 (0.93-1.34) |
| <b>Time to fall asleep</b>                  |                         |                         |                         |                         |                         |                         |                  |                  |
| >30 minutes vs. ≤30 minutes (reference)     | <b>1.32 (1.15-1.51)</b> | <b>1.44 (1.17-1.77)</b> | <b>1.18 (1.02-1.35)</b> | 1.16 (0.94-1.44)        | <b>1.16 (1.01-1.34)</b> | 1.08 (0.86-1.34)        | 1.09 (0.95-1.26) | 1.04 (0.84-1.30) |
| <b>Frequent night awakenings</b>            |                         |                         |                         |                         |                         |                         |                  |                  |
| Yes † vs. No (reference)                    | 1.13 (0.97-1.32)        | <b>1.43 (1.13-1.81)</b> | 1.12 (0.96-1.31)        | <b>1.32 (1.04-1.68)</b> | 1.12 (0.96-1.31)        | <b>1.30 (1.02-1.66)</b> | 1.04 (0.89-1.22) | 1.20 (0.94-1.53) |
| <b>Napping Frequency</b>                    |                         |                         |                         |                         |                         |                         |                  |                  |
| ≥3 times/week vs. <3 times/week (reference) | <b>1.54 (1.32-1.81)</b> | <b>1.88 (1.47-2.40)</b> | <b>1.44 (1.22-1.68)</b> | <b>1.60 (1.25-2.05)</b> | <b>1.32 (1.12-1.56)</b> | <b>1.43 (1.10-1.84)</b> | 1.16 (0.98-1.36) | 1.23 (0.95-1.60) |
| <b>Cumulative sleep score ‡</b>             |                         |                         |                         |                         |                         |                         |                  |                  |
| 1 vs. 0 (reference)                         | <b>1.18 (1.03-1.34)</b> | <b>1.45 (1.21-1.74)</b> | 1.09 (0.96-1.24)        | <b>1.22 (1.01-1.47)</b> | 1.03 (0.91-1.18)        | <b>1.22 (0.99-1.46)</b> | 0.98 (0.86-1.13) | 1.13 (0.93-1.37) |
| 2 to 4 vs. 0 (reference)                    | <b>1.52 (1.32-1.77)</b> | <b>2.12 (1.71-2.64)</b> | <b>1.30 (1.12-1.51)</b> | <b>1.61 (1.29-2.01)</b> | <b>1.24 (1.07-1.45)</b> | <b>1.43 (1.14-1.81)</b> | 1.10 (0.94-1.28) | 1.25 (0.99-1.58) |

HR = hazard ratio, CI = confidence interval, HS=high school, GED=general education diploma, BMI=body mass index, MET=metabolic equivalent of task. Significant hazard ratios are bolded.

\* Long sleep duration (>9 h) is not reported (*N* = 356).

† Frequent night awakenings was classified as "No" if participant reported waking up while sleeping less than 3 times per week and "Yes" if participant reported waking up while sleeping more than 3 times per night/day for more than 3 nights/days per week.

‡ Cumulative sleep score was calculated by summing each participant's "yes" response for each sleep characteristic. Scores range from 0 to 4, with poor sleep characteristics being combined into the category "2 to 4"

Model I - adjusted for age (years) at baseline

Model II - further adjusted for race/ethnicity, educational attainment (<HS, HS/GED, some college, ≥bachelor's degree), marital status, and status of shift work/irregular hours (yes/no)

Model III - further adjusted for smoking status (current, past, never), alcohol consumption (current, past, never), diet (daily glycemic load), and physical activity (MET hours)

Model IV - further adjusted for hypertension, waist-to-hip ratio (WHR), and BMI (kg/m<sup>2</sup>) measured at baseline

**Supplementary Table 8. Hazard ratios (95% CI) for type 2 diabetes risk among 39,071 adult women in the Sister Study, with women with poor sleep compared to women with recommended sleep, with a sensitivity analysis for baseline clinical depression.**

| Depression Status                           | Model I                 |                         | Model II                |                         | Model III               |                         | Model IV         |                         |
|---------------------------------------------|-------------------------|-------------------------|-------------------------|-------------------------|-------------------------|-------------------------|------------------|-------------------------|
|                                             | HR (95% CIs)            |                         | HR (95% CIs)            |                         | HR (95% CIs)            |                         | HR (95% CIs)     |                         |
|                                             | Yes                     | No                      | Yes                     | No                      | Yes                     | No                      | Yes              | No                      |
| <b>Sleep duration *</b>                     |                         |                         |                         |                         |                         |                         |                  |                         |
| Short Sleep vs. Recommended (reference)     | 1.18 (0.96-1.46)        | <b>1.40 (1.25-1.56)</b> | 1.00 (0.80-1.24)        | <b>1.18 (1.05-1.32)</b> | 0.97 (0.78-1.21)        | <b>1.16 (1.03-1.30)</b> | 0.91 (0.73-1.14) | 1.06 (0.94-1.19)        |
| <b>Time to fall asleep</b>                  |                         |                         |                         |                         |                         |                         |                  |                         |
| >30 minutes vs. ≤30 minutes (reference)     | <b>1.32 (1.07-1.63)</b> | <b>1.31 (1.15-1.51)</b> | 1.19 (0.96-1.48)        | 1.12 (0.97-1.29)        | 1.12 (0.90-1.40)        | 1.12 (0.97-1.28)        | 1.13 (0.90-1.41) | 1.05 (0.91-1.21)        |
| <b>Frequent night awakenings</b>            |                         |                         |                         |                         |                         |                         |                  |                         |
| Yes † vs. No (reference)                    | 1.00 (0.77-1.30)        | <b>1.28 (1.10-1.48)</b> | 0.93 (0.71-1.21)        | <b>1.26 (1.09-1.46)</b> | 0.95 (0.73-1.25)        | <b>1.25 (1.07-1.45)</b> | 0.89 (0.68-1.16) | 1.15 (0.99-1.34)        |
| <b>Napping Frequency</b>                    |                         |                         |                         |                         |                         |                         |                  |                         |
| ≥3 times/week vs. <3 times/week (reference) | <b>1.54 (1.20-1.96)</b> | <b>1.62 (1.38-1.90)</b> | <b>1.47 (1.15-1.88)</b> | <b>1.45 (1.24-1.71)</b> | <b>1.32 (1.02-1.71)</b> | <b>1.34 (1.14-1.58)</b> | 1.21 (0.93-1.56) | <b>1.20 (1.01-1.41)</b> |
| <b>Cumulative sleep score ‡</b>             |                         |                         |                         |                         |                         |                         |                  |                         |
| 1 vs. 0 (reference)                         | <b>1.26 (1.01-1.56)</b> | <b>1.25 (1.10-1.41)</b> | 1.14 (0.91-1.42)        | 1.12 (0.99-1.26)        | 1.12 (0.89-1.40)        | 1.07 (0.94-1.22)        | 1.08 (0.86-1.35) | 1.01 (0.89-1.14)        |
| 2 to 4 vs. 0 (reference)                    | <b>1.43 (1.12-1.83)</b> | <b>1.76 (1.53-2.21)</b> | 1.20 (0.93-1.54)        | <b>1.42 (1.23-1.64)</b> | 1.10 (0.85-1.42)        | <b>1.37 (1.18-1.58)</b> | 1.01 (0.78-1.31) | <b>1.19 (1.02-1.38)</b> |

HR = hazard ratio, CI = confidence interval, HS=high school, GED=general education diploma, BMI=body mass index, MET=metabolic equivalent of task. Significant hazard ratios are bolded.

\* Long sleep duration (>9 h) is not reported (*N* = 356).

† Frequent night awakenings was classified as "No" if participant reported waking up while sleeping less than 3 times per week and "Yes" if participant reported waking up while sleeping more than 3 times per night/day for more than 3 nights/days per week.

‡ Cumulative sleep score was calculated by summing each participant's "yes" response for each sleep characteristic. Scores range from 0 to 4, with poor sleep characteristics being combined into the category "2 to 4"

Model I - adjusted for age (years) at baseline

Model II - further adjusted for race/ethnicity, educational attainment (<HS, HS/GED, some college, ≥bachelor's degree), marital status, and status of shift work/irregular hours (yes/no)

Model III - further adjusted for smoking status (current, past, never), alcohol consumption (current, past, never), diet (daily glycemic load), and physical activity (MET hours)

Model IV - further adjusted for hypertension, waist-to-hip ratio (WHR), and BMI (kg/m<sup>2</sup>) measured at baseline

**Supplemental Table 9. Hazard ratios (95% CI) for type 2 diabetes risk among 39,071 adult women in the Sister Study, with women with poor sleep compared to women with recommended sleep.**

|                                       |        | <b>Model I</b>          | <b>Model II</b>         | <b>Model III</b>        | <b>Model IV</b>         | <b>Model V</b>          |
|---------------------------------------|--------|-------------------------|-------------------------|-------------------------|-------------------------|-------------------------|
|                                       | n      | HR (95% CIs)            |
| <b>Napping Frequency</b>              |        |                         |                         |                         |                         |                         |
| ≥3 times/week vs.                     | 3,681  | <b>1.65 (1.45-1.89)</b> | <b>1.50 (1.32-1.72)</b> | <b>1.36 (1.18-1.56)</b> | <b>1.19 (1.04-1.37)</b> | <b>1.30 (1.13-1.49)</b> |
| <3 times/week (reference)             | 35,390 |                         |                         |                         |                         |                         |
| <b>Napping Frequency</b>              |        |                         |                         |                         |                         |                         |
| ≥3 times per week                     | 3,681  | <b>1.94 (1.67-2.26)</b> | <b>1.80 (1.55-2.10)</b> | <b>1.62 (1.38-1.89)</b> | <b>1.33 (1.14-1.56)</b> | <b>1.53 (1.30-1.79)</b> |
| ≥once per month and <3 times per week | 13,624 | <b>1.41 (1.25-1.58)</b> | <b>1.43 (1.27-1.61)</b> | <b>1.38 (1.22-1.55)</b> | <b>1.20 (1.07-1.36)</b> | <b>1.35 (1.20-1.52)</b> |
| < once per month                      | 8,540  | 1.09 (0.95-1.25)        | <b>1.16 (1.01-1.33)</b> | <b>1.18 (1.02-1.36)</b> | 1.12 (0.97-1.29)        | <b>1.17 (1.01-1.34)</b> |
| Never (reference)                     | 13,226 |                         |                         |                         |                         |                         |

HR = hazard ratio, CI = confidence interval, HS=high school, GED=general education diploma, BMI=body mass index, MET=metabolic equivalent of task. Significant hazard ratios are bolded.

Model I - adjusted for age (years) at baseline

Model II - further adjusted for race/ethnicity, educational attainment (<HS, HS/GED, some college, ≥bachelor's degree), marital status, and status of shift work/irregular hours (yes/no)

Model III - further adjusted for smoking status (current, past, never), alcohol consumption (current, past, never), diet (daily glycemic load), and physical activity (MET hours)

Model IV - further adjusted for hypertension, waist-to-hip ratio (WHR), and BMI (kg/m<sup>2</sup>) measured at baseline

Model V - without WHR and BMI
